# Supplementary material for: Regulation of Notch1 Signalling by Long Non-Coding RNAs in Cancers and Other Health Disorders
Source: MDPI journal article supplement (doi:10.3390/ijms241612579), 2023-08-08
Supplement: s1 [file s1]

**Table S1.** Interaction between lncRNAs and Notch1 signalling in various health disorders.

| Localisation            | Disease                          | lncRNA                         | NOTCH1 expression | Cell line                                         | Animal models       | Patients                                        | Reference |
|-------------------------|----------------------------------|--------------------------------|-------------------|---------------------------------------------------|---------------------|-------------------------------------------------|-----------|
| Cardiac system          | Acute myocardial infarction      | <i>XIST</i> ↑                  | ↑                 | -                                                 | AMI rat model       | -                                               | [1]       |
|                         | Calcific aortic valve disease    | <i>H19</i> ↑                   | ↓                 | VICs, Saos2, COS7                                 | -                   | 36 patients                                     | [2]       |
|                         | Myocardial infarction            | <i>KCNQ1</i><br><i>OT1</i> ↑   | ↑                 | -                                                 | C57BL/6 male mice   | -                                               | [3]       |
|                         | Ischemic stroke                  | <i>H19</i> ↑                   | ↓                 | -                                                 | male C57BL/6 J mice | 40 patients                                     | [4]       |
| Immune system           | T-ALL                            | <i>NALT1</i> ↑                 | ↑                 | Jurkat cells                                      | -                   | Bone marrow of 20 children                      | [5]       |
|                         | Systemic sclerosis (SSc)         | <i>HOTAIR</i> ↑                | ↑                 | -                                                 | -                   | 12 adult patients                               | [6]       |
| Neural system           | Epilepsy                         | <i>NEAT1</i> ↑                 | ↑                 | CTX-TNA                                           | -                   | 6 patients                                      | [7]       |
|                         | Intervertebral disc degeneration | <i>FAM83</i><br><i>H-AS1</i> ↑ | ↑                 | -                                                 | -                   | 10 patients                                     | [8]       |
|                         | Nasopharyngeal carcinoma         | <i>SNHG1</i> 2↑                | ↑                 | SUNE1, CNE1, CNE2 68, HNE-1                       | -                   | 139 tissue samples                              | [9]       |
| Head and neck cancer    | Esophageal cancer                | <i>MALAT1</i> ↑                | ↑                 | TE-1, EC109, KYSE30, OE21                         | -                   | -                                               | [10]      |
|                         |                                  | <i>SNHG1</i> ↑                 | ↑                 | Eca109, TE-1                                      | -                   | 72 patients                                     | [11]      |
|                         | Laryngeal cancer                 | <i>SNHG1</i> ↑                 | ↑                 | -                                                 | -                   | 42 patients (different tumour stages)           | [12]      |
| Digestive system cancer | Pancreatic carcinoma             | <i>MACC1</i> - <i>AS1</i> ↑    | ↑                 | BxPC-3, PANC-1, MIA PaCa-2, KP-2, AsPC-1, Capan-1 | -                   | 2 cohorts (98 and 124 patients) primary tissues | [13]      |

|                    |                            |                                                       |   |                                                                                   |                                     |                                                        |      |
|--------------------|----------------------------|-------------------------------------------------------|---|-----------------------------------------------------------------------------------|-------------------------------------|--------------------------------------------------------|------|
|                    | Gastric cancer             | <i>NALT1</i><br>( <i>LINC01573</i> ) ↑                | ↑ | SGC-7901,<br>BGC-823                                                              | -                                   | 336 patients after D2 lymph node dissected gastrectomy | [14] |
|                    |                            | <i>LINC00346</i> ↑<br>(sponge for <i>miR-34a-5p</i> ) | ↑ | MGC803,<br>BGC823,<br>MKN28,<br>MKN45,<br>SGC7901                                 | Xenografts in athymic (nu/nu) mouse | 58 gastric adenocarcinoma tissue samples               | [15] |
|                    | Colorectal carcinoma       | <i>FAM83H-AS1</i> ↑                                   | ↑ | SW480,<br>LoVo,<br>HCT116,<br>HT29                                                | -                                   | 40 patients                                            | [16] |
|                    |                            | <i>MALAT1</i> ↑                                       | ↑ | COLO205,<br>HCT-116,<br>LoVo,<br>HT26,<br>SW480                                   | nude Balb/c mice                    | -                                                      | [17] |
|                    | Hepatocellular carcinoma   | <i>LINC00261</i> ↓                                    | ↑ | SMCC-7721,<br>MHCC97L,<br>MHCC97H                                                 | -                                   | 66 tissue samples                                      | [18] |
| Reproductive tract | Ovarian cancer             | <i>DLX6-AS1</i> ↑                                     | ↑ | HEY,<br>SKOV3,<br>OVCAR-3                                                         | -                                   | 128 tissue samples                                     | [19] |
|                    |                            | <i>MALAT1</i> ↑                                       | ↑ | A2780,<br>OVCAR3,<br>COC1,<br>A2780/<br>CDDP,<br>COC1/CD<br>DP,<br>OVCAR3/<br>DDP | -                                   | 20 paired tumour tissue samples                        | [20] |
|                    | Endometrial carcinoma (EC) | <i>MEG3</i> ↓                                         | ↑ | HEC-1A,<br>KLE                                                                    | -                                   | 30 tumour tissue samples                               | [21] |
|                    |                            | <i>DCST1-AS1</i> ↑                                    | ↑ | HEC-1                                                                             | -                                   | 62 patients                                            | [22] |
|                    | Prostate carcinoma         | <i>LINC01638</i> ↑                                    | ↑ | -                                                                                 | -                                   | 42 patients                                            | [23] |

|               |               |                   |   |                                 |   |                                   |      |
|---------------|---------------|-------------------|---|---------------------------------|---|-----------------------------------|------|
|               |               | <i>GHET1</i><br>↑ | ↑ | LNCap,<br>C4-2                  | - | 30 patients                       | [24] |
| Other cancers | Breast cancer | <i>linc-ROR</i> ↑ | ↓ | MDA-MB-231                      | - | -                                 | [25] |
|               |               | <i>SNHG7</i><br>↑ | ↑ | -                               | - | 37 pairs of tumour tissue samples | [26] |
|               | Lung cancer   | <i>NBR2</i> ↓     | ↑ | -                               | - | 50 NSCLC patients tissue samples  | [27] |
|               |               | <i>LBX2-ASI</i> ↑ | ↑ | A549, PC9, H1975, SPC-A1, H1299 | - | 165 NSCLC patients                | [28] |
|               |               | <i>EGFR-ASI</i> ↓ | ↑ | NCH-H460, NCH-H23               | - | 87 NSCLC patients                 | [29] |
|               |               | <i>LET</i> ↓      | ↑ | A549, 95D, NCI-H292, NCI-H1975  | - | 66 NSCLC patients                 | [30] |
|               | Osteosarcoma  | <i>MEG3</i> ↓     | ↑ | MG-63, U2OS                     | - | -                                 | [31] |
|               |               | <i>NBR2</i> ↓     | ↑ | MG-63, U2OS, SAOS-2             | - | 62 patients                       | [32] |
|               |               | <i>CRNDE</i><br>↑ | ↑ | MG-63, SAOS-2, U2OS             | - | 72 patients                       | [33] |

Abbreviations: ↑ represents upregulation, ↓ represents downregulation.
